# Supplementary material
Source: Springer Nature journal article supplement (https://www.springermedizin.de/resource/supplementary/12887_2011_698_MOESM3_ESM.pdf/9475840)

**a**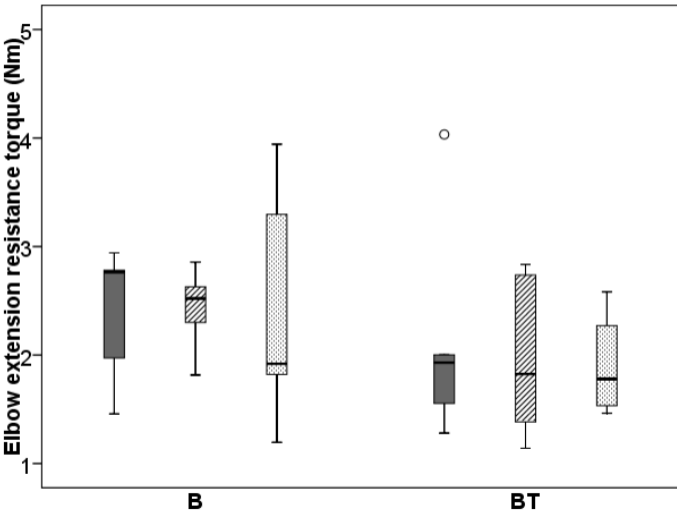**b**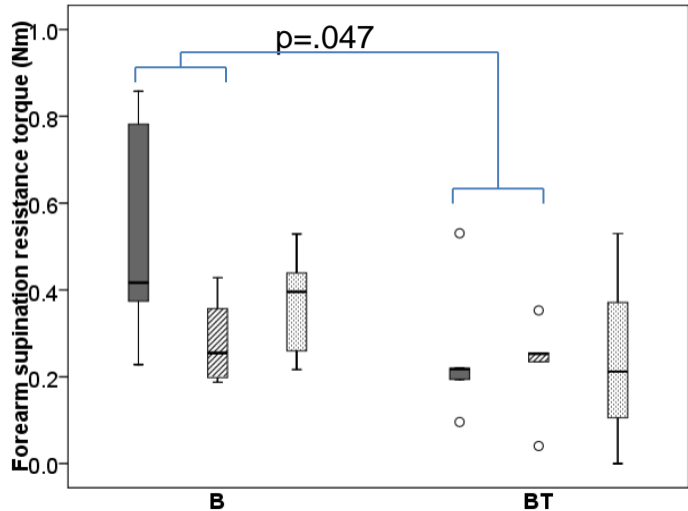

Supplement: MOESM3 [file 9475840]
